# Supplementary material for: Estimating the sample mean and standard deviation from the sample size, median, range and/or interquartile range
Source: PubMed Central journal article supplement (PMC4383202; doi:10.1186/1471-2288-14-135), 2014-12-19

**Log-Normal**

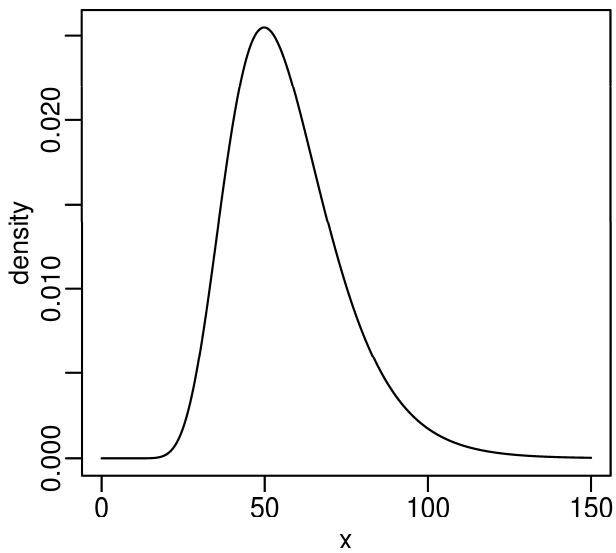

**Beta**

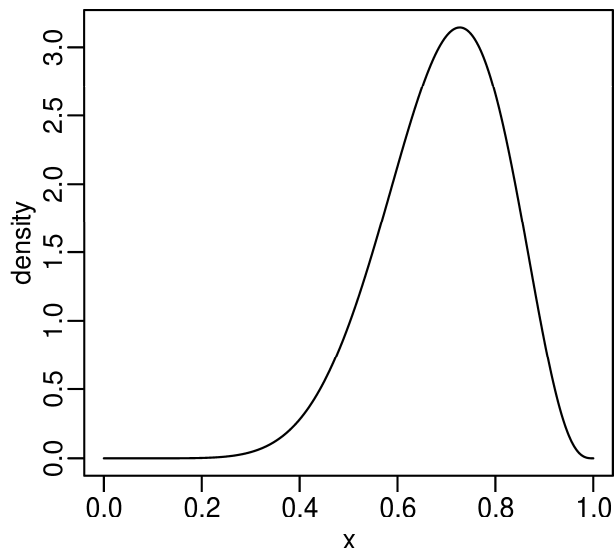

**Exponential**

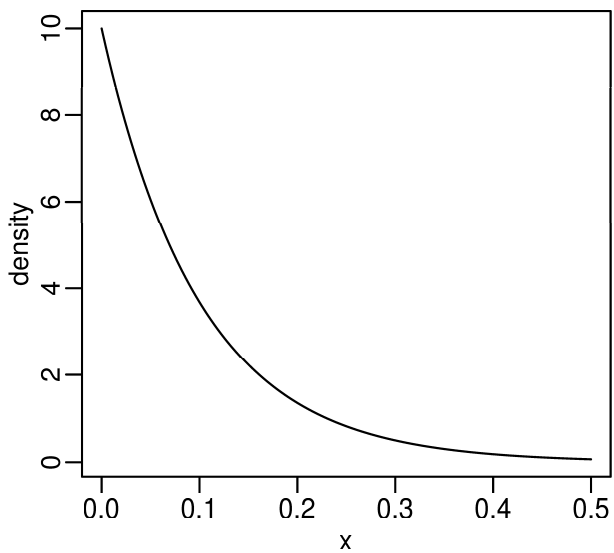

**Weibull**

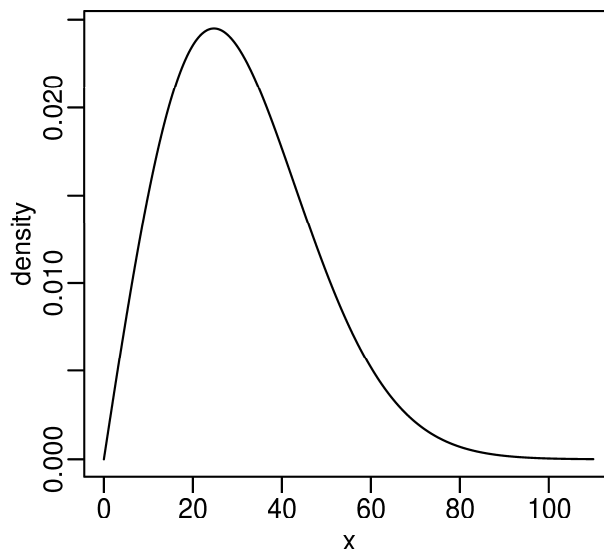

Supplement: 12874_2014_1175_MOESM1_ESM.pdf [file 12874_2014_1175_MOESM1_ESM.pdf]
